# Supplementary material for: Constructing orderly crystal orientation with a bidirectional coordinator for high efficiency and stable perovskite solar cells
Source: Royal Society of Chemistry journal article supplement (doi:10.1039/d4ee02017k), 2024-01-01
Supplement: d4ee02017k1.pdf [file d4ee02017k1.pdf]

## Supplementary Information for

### **Constructing Orderly Crystal Orientation with Bidirectional Coordinator for High Efficiency and Stable Perovskite Solar Cells**

*Jaehwi Lee,<sup>‡a</sup> Yun Seop Shin,<sup>‡ab</sup> Elham Oleiki,<sup>‡c</sup> Jongdeuk Seo,<sup>a</sup> Jina Roe,<sup>a</sup> Dongmin Lee,<sup>b</sup> YeonJeong Lee,<sup>a</sup> Taehee Song,<sup>a</sup> Hyungsu Jang,<sup>a</sup> Ji Won Song,<sup>b</sup> Woosuk Lee,<sup>b</sup> Geunsik Lee,<sup>\*c</sup> Jin Young Kim,<sup>\*ab</sup> Dong Suk Kim<sup>\*ab</sup>*

<sup>a</sup> School of Energy and Chemical Engineering, Ulsan National Institute of Science and Technology (UNIST), Ulsan 44919, Republic of Korea. E-mail: [jykim@unist.ac.kr](mailto:jykim@unist.ac.kr)

<sup>b</sup> Graduate School of Carbon Neutrality, Ulsan National Institute of Science and Technology (UNIST), Ulsan 44919, Republic of Korea. E-mail: [kimds@unist.ac.kr](mailto:kimds@unist.ac.kr)

<sup>c</sup> Center for Superfunctional Materials, Department of Chemistry, Ulsan National Institute of Science and Technology (UNIST), Ulsan 44919, Republic of Korea. E-mail: [gslee@unist.ac.kr](mailto:gslee@unist.ac.kr)

<sup>‡</sup> These authors equally contributed to this work

<sup>\*</sup> Corresponding author. E-mail: [gslee@unist.ac.kr](mailto:gslee@unist.ac.kr), [jykim@unist.ac.kr](mailto:jykim@unist.ac.kr), [kimds@unist.ac.kr](mailto:kimds@unist.ac.kr)

## Experimental Section

### Materials

Fluorine-doped tin oxide on glass (FTO glass,  $7 \Omega \text{ sq}^{-1}$ ) was purchased from Asahi. Hydrogen peroxide ( $\text{H}_2\text{O}_2$ , electronic grade), ethanol (EtOH, 95%, special grade) and ethyl ether (99.5%, special grade) were purchased from SAMCHUN. Hydrochloride (HCl, 37 wt% in water) was purchased from Junsei Chemical Co. Methylammonium chloride (MACl, for synthesis), *N,N*-dimethylformamide (DMF, anhydrous 99.8%), dimethyl sulfoxide (DMSO, >99.5%), 2-propanol (IPA, anhydrous, 99.5%), 2-methoxyethanol (2-ME, anhydrous, 99.8%), acetonitrile (anhydrous, 99.8%), chlorobenzene (CB, anhydrous, 99.8%), titanium diisopropoxide bis(acetylacetonate) ( $\text{Ti}(\text{acac})_2$ , 75 wt% in isopropanol), potassium chloride (KCl, ACS reagent, 99.999% trace metals basis), cesium formate (CsFo, 98%), cesium acetate (CsAc,  $\geq 99.99\%$  trace metal basis), cesium trifluoroacetate (CsTFA, BioUltra,  $\geq 99.0\%$ ), 4-*tert*-butylpyridine (*t*BP, 98%), and bis(trifluoromethane)sulfonimide lithium salt (LiTFSI) were purchased from Sigma-Aldrich. Tin(IV) oxide ( $\text{SnO}_2$ , 15% in  $\text{H}_2\text{O}$  colloidal dispersion) was purchased from Thermo Fisher Scientific. Lead(II) iodide ( $\text{PbI}_2$ , 99.99% trace metal basis) was purchased from TCI. Formamidinium iodide (FAI) and *n*-octylammonium iodide (OAI) were purchased from Greatcell Solar Materials. Spiro-OMeTAD (99.5%) and FK209 Co(III) TFSI salt (>99%) were purchased from Lumtec.

### Materials Synthesis

Formamidinium lead triiodide ( $\text{FAPbI}_3$ ) black powder was synthesized by mixing FAI (0.8M) with  $\text{PbI}_2$  (1:1 molar ratio) in 2-ME with stirring. The mixture was heated to 120 °C with a stirring bar, and then recrystallized by adding CB dropwise into the mixture. Finally, the precipitated  $\text{FAPbI}_3$  powder was filtered using a glass filter and baked at 150 °C for 30 min.

### PSCs Fabrication

FTO glass was cleaned following the RCA-SC2 procedure using blends of  $\text{H}_2\text{O}_2$ , HCl, and  $\text{H}_2\text{O}$ , and subsequently, acetone and IPA were used sequentially in an ultrasonic bath. The compact  $\text{TiO}_2$  (c- $\text{TiO}_2$ ) solution was prepared by diluting  $\text{Ti}(\text{acac})_2$  in EtOH (with 1:15 v/v %), followed by deposition onto FTO substrates using the spray coating method under 450 °C conditions. These substrates were annealed at 450 °C for 1 h to achieve the desired crystallinity of  $\text{TiO}_2$ . To prepare a bilayer with a structure of c- $\text{TiO}_2/\text{SnO}_2$ , the diluted  $\text{SnO}_2$  nanoparticles

were coated onto the c-TiO<sub>2</sub> substrates, and subsequently annealed at 100 °C for 1 h in a vacuum oven. Following this, a solution of 4 mg/mL KCl in DI water was spin-coated at 3000 rpm for 30 s and annealed at 100 °C for 30 min. Before use, the substrates were stored in a vacuum oven with 100 °C for 1–2 days. For the target substrate, prior to depositing perovskite films, CsX in DI water was spin-coated at 3000 rpm for 30 s and annealed at 150 °C for 15 min. The perovskite precursor solution was prepared by mixing 1,202 mg FAPbI<sub>3</sub>, 35 mol% MACl, and 0.8 mol% MAPbBr<sub>3</sub> in a mixture of DMF and DMSO (4:1). The filtered perovskite solution, using a 0.2 μm PVDF filter, was spread over the as-prepared bilayer substrate at 7,500 rpm for 50 s with a ramping duration of 0.1 s. During the spin-coating process, 1 mL of diethyl ether, serving as an anti-solvent, was dripped after spinning for 10 s, followed by immediate annealing on a hot plate at 150 °C for 15 min and 100 °C for 30 min sequentially. To passivate the surface of the perovskite, 4 mg/mL of OAI dissolved in IPA was spin-coated on top of the perovskite film at 3,000 rpm for 30 s. After then, the hole-transporting layer was deposited by spin-coating a spiro-OMeTAD (113.9 mg/mL, Lumtech) solution, containing varying dopant ratios of *t*BP, LiTFSI, and FK209 Co(III) TFSI salt, at 4,000 rpm for 30 s. Finally, a gold electrode (70 nm) was deposited by thermal evaporation under high vacuum of 10<sup>-6</sup> Torr.

### DFT Calculation Details

DFT calculations were performed using the Vienna Ab initio Simulation Package (VASP) suite, which is based on the plane wave pseudopotential approach.<sup>1</sup> The generalized gradient approximation (GGA) within the Perdew-Burke-Ernzerhof (PBE) parameterization was utilized as the exchange-correlation functional.<sup>2</sup> Furthermore, van der Waals (vdW) interactions were incorporated by adding dispersion correction to the total energy and forces by employing the DFT-D3 approach.<sup>3</sup> To model the FAPbI<sub>3</sub> (001) surface, the cubic phase is considered with an experimentally determined lattice parameter of  $a = 6.36 \text{ \AA}$ .<sup>4</sup> The 1×1 and 2×2 slabs, including four-unit cells along the [001] direction, were considered for HCO<sub>2</sub>, CH<sub>3</sub>CO<sub>2</sub>, and CF<sub>3</sub>CO<sub>2</sub> adsorption on the ideal and defective perovskite surface, respectively. A vacuum layer of ~15 Å was provided to avoid spurious interactions between the periodic images. Structural optimization was performed on 3×3×1 and 2×2×1 k-meshes for the ideal and defective perovskite surfaces, respectively, with a kinetic energy cutoff of 400 eV. The convergence criteria of 10<sup>-4</sup> eV and 0.01 eV Å<sup>-1</sup> was employed for energies and forces, respectively. The density of state calculation was performed on a 3×3×1 k-mesh with 10<sup>-6</sup> eV convergence criteria of energy. The concentration of 10<sup>14</sup> molecules cm<sup>-2</sup> was considered for

the ideal surface coverage. The surface defect concentration of  $10^{13} \text{ cm}^{-2}$  was introduced to the perovskite surface. For molecular adsorption sites, four high symmetry positions were considered, which are referenced with respect to the position of the molecular CH, CH<sub>3</sub>, and CF<sub>3</sub> on the FAPbI<sub>3</sub> surface, i.e., Pb top (Pb<sub>top</sub>), I top (I<sub>top</sub>), hollow site on top of surface FA ions, and bridge position between the Pb and I atoms.

The molecular adsorption energy ( $E_{\text{ad}}$ ) is defined as  $E_{\text{ad}} = E(\text{molecule/FAPbI}_3) - E(\text{FAPbI}_3) - E(\text{molecule})$ , where  $E(\text{molecule/FAPbI}_3)$ ,  $E(\text{FAPbI}_3)$ , and  $E(\text{molecule})$  correspond to the total energies of the combined molecule/FAPbI<sub>3</sub> system, FAPbI<sub>3</sub> slab, and isolated molecule, respectively.

### **Characterization of Perovskite Films**

UV absorption spectra were carried out using a spectrophotometer (Cary 5000, Agilent). PL spectra were obtained using a fluorometer with xenon lamp as an excitation source (nF900, Edinburgh Instruments). The TRPL spectra were measured using a time-correlated single-photon counting (TCPSC) spectrometer (FluoTime 300, PciQuant). The samples were photoexcited at 510 nm using a pulsed diode laser head (LDH-D-C-510, PicoQuant). AFM images were measured with a microscope (Dimension ICON, Bruker Nano Surface). FTIR spectra were measured using a spectrometer with attenuated total reflection mode (670-IR, Varian). XPS and UPS spectra were measured using a spectrometer (ESCALAB 250XI, Thermo Fisher Scientific) at a base pressure of  $1.0 \times 10^{-9}$  Torr with a monochromated Al-K $\alpha$  X-ray source. UPS samples were prepared on thermally evaporated Au substrates. Surface contact angles were obtained using a high-speed camera (Fastcam Mini UX50, Photron) with a goniometer (DSA100, KRUSS GmbH). Cross-sectional SEM images were obtained with a cold field-emission scanning electron microscope (S-4800, Hitachi High-Tech.). XRD patterns of the perovskite films were measured using a diffractometer (D8 ADVANCE, Bruker AXS) equipped with Cu-K $\alpha$  radiation, ( $\lambda = 0.1542 \text{ nm}$ ) as the X-ray source. GIXRD patterns and rocking curves of the perovskite films were performed using a diffractometer (D8 DISCOVERY, Bruker) equipped with Cu-K $\alpha$  radiation, ( $\lambda = 0.1542 \text{ nm}$ ) as the X-ray source.

### **Characterization of Charge-Carrier Dynamics**

Electrical conductivities of CsX-treated SnO<sub>2</sub> were evaluated by measuring the  $J$ - $V$  curves with the structure of ITO/SnO<sub>2</sub>/CsX/Au, where ITO represents indium tin oxide. Mott-Schottky curves were measured using a potentiostat (VMP3/VSP-300, BioLogic) in the 0-1.3

V voltage range and at a frequency of 0.5 MHz under dark conditions. EIS curves of PSCs were measured using a potentiostat (WIZEIS-1200premium, WizMAC) under dark conditions.

### **Characterization of PSCs**

PSCs underwent measurements utilizing a solar simulator (Newport-Oriel 94083A, Class AAA) in conjunction with a Keithley source meter 2400, under ambient conditions (20% RH at 25 °C). The light intensity was calibrated to 100 mW cm<sup>-2</sup> employing a Si-reference cell certified by the National Renewable Energy Laboratory. To mitigate artifacts induced by scattered light, a non-reflective mask with an aperture area of 0.0802 cm<sup>2</sup> was used to shield the active area of the device. The conventional  $J$ - $V$  curves were measured under both forward (from a forward bias (-0.05 V) to a short circuit (1.30 V)) and reverse (from a forward bias (1.30 V) to a short circuit (-0.05 V)) scans with the fixed step voltage of 20 mV. EQEs were measured using a quantum efficiency measurement system (QUANTX-300, Newport Co.)

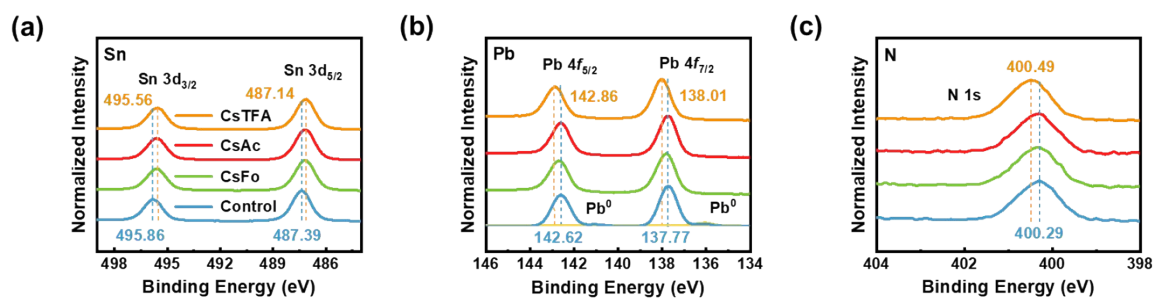

**Fig. S1** XPS spectra corresponding to (a) Sn 3d of the control- and CsX-treated SnO<sub>2</sub>, (b) Pb 4f and (c) N 1s of the perovskite films that were peeled off from the control- and CsX-treated SnO<sub>2</sub>.

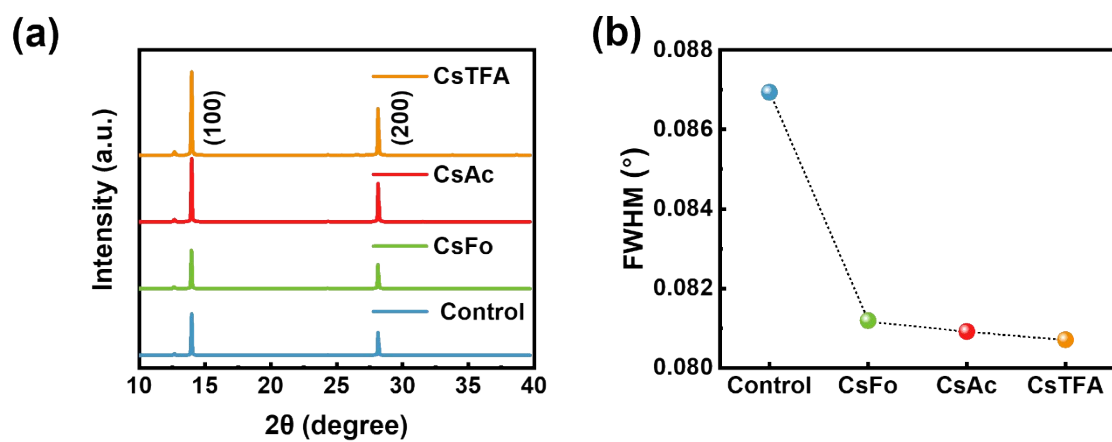

**Fig. S2** (a) XRD patterns of the deposited perovskite films on the control- and CsX-treated SnO<sub>2</sub>. (b) FWHM of (001) crystal diffraction peak obtained from the XRD patterns of the perovskite films.

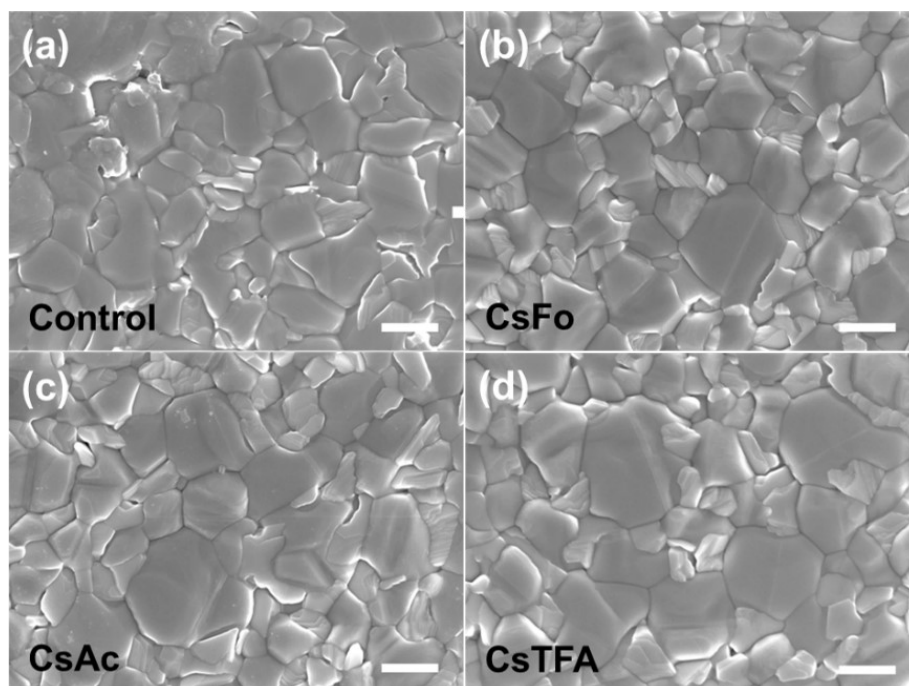

**Fig. S3** Top-view SEM images of the perovskite films deposited on the control- and CsX-treated SnO<sub>2</sub>. (The scale bar is 1 μm).



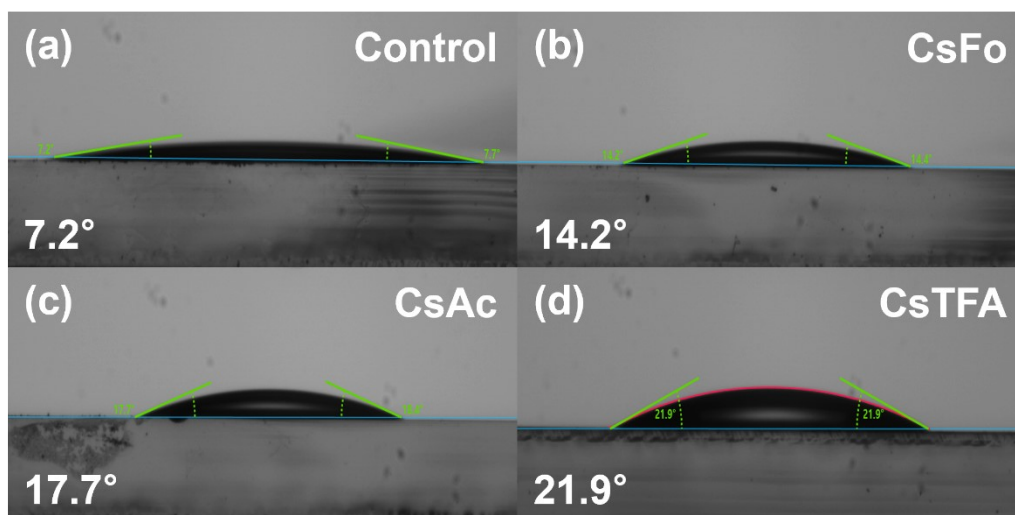

**Fig. S4** The contact angles of water droplet on the control- and CsX-treated SnO<sub>2</sub>.

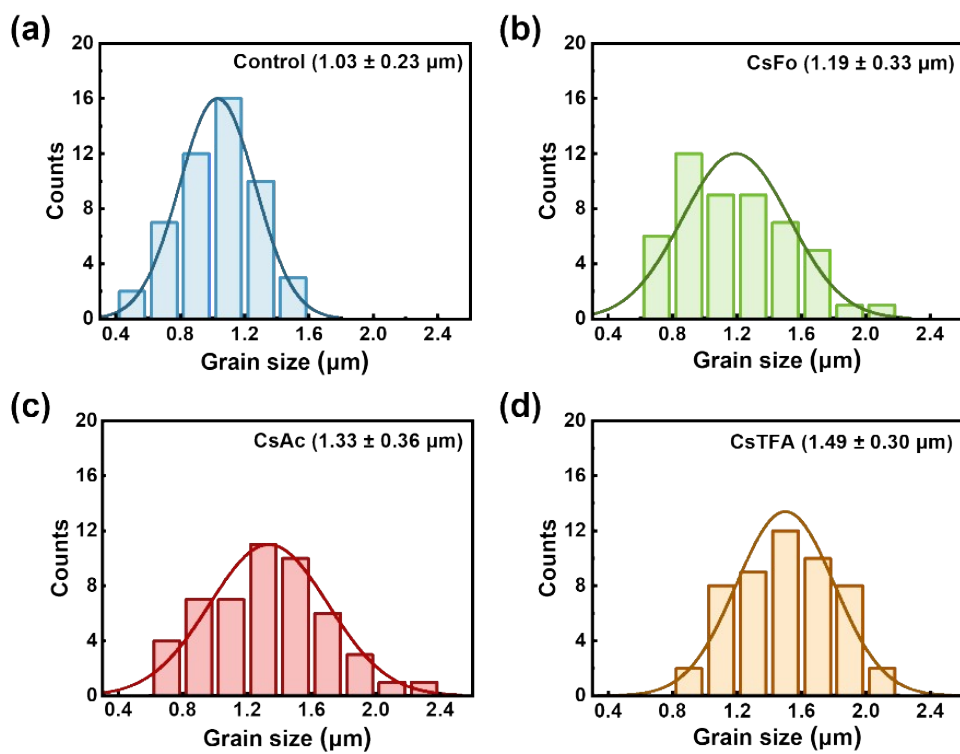

**Fig. S5** The distribution of grain sizes of the perovskite films deposited on the control- and CsX-treated  $\text{SnO}_2$ .

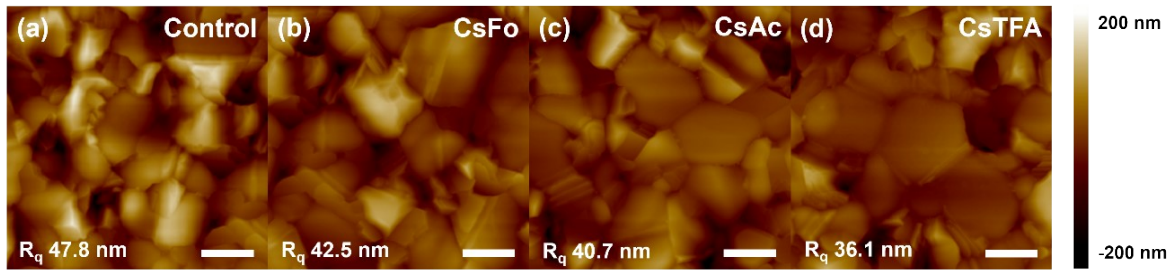

**Fig. S6** AFM images of the perovskite films deposited on the control- and CsX-treated SnO<sub>2</sub>. (The scale bar is 1 μm).

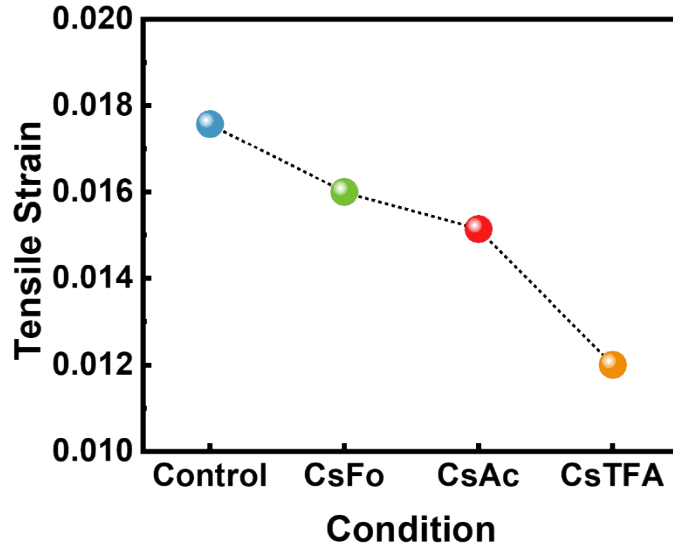

**Fig. S7** Tensile strain values obtained from GIXRD measurements of the perovskite films deposited on the control- and CsX-treated SnO<sub>2</sub>. We calculated the tensile strain values within the perovskite films using the following the equation<sup>5</sup>:

$$\sigma = \frac{E}{2(1+\nu)} \frac{\pi}{180} \cot \theta_0 \frac{\partial(2\theta)}{\partial \sin^2(\psi)} \quad \varepsilon = \frac{\sigma}{E}$$

$\varepsilon$ : strain,  $\sigma$ : stress (Pa=N/m<sup>2</sup>),  $E$ : Young's modulus (9.90 for FAPbI<sub>3</sub>, Pa=N/m<sup>2</sup>),<sup>6</sup>  $\nu$ : Poisson's ratio (0.40 for FAPbI<sub>3</sub>),<sup>6</sup>  $\theta_0$ : strain-free angle,  $\theta$ : incident angle,  $\psi(=\omega)$ : angle the diffraction vector

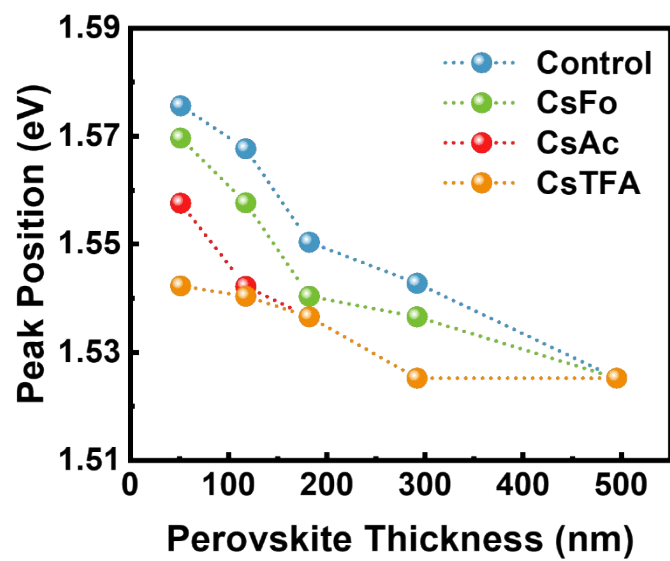

**Fig. S8** The variation of PL peak positions with varying the thickness of the perovskite films deposited on the control- and CsX-treated SnO<sub>2</sub>.

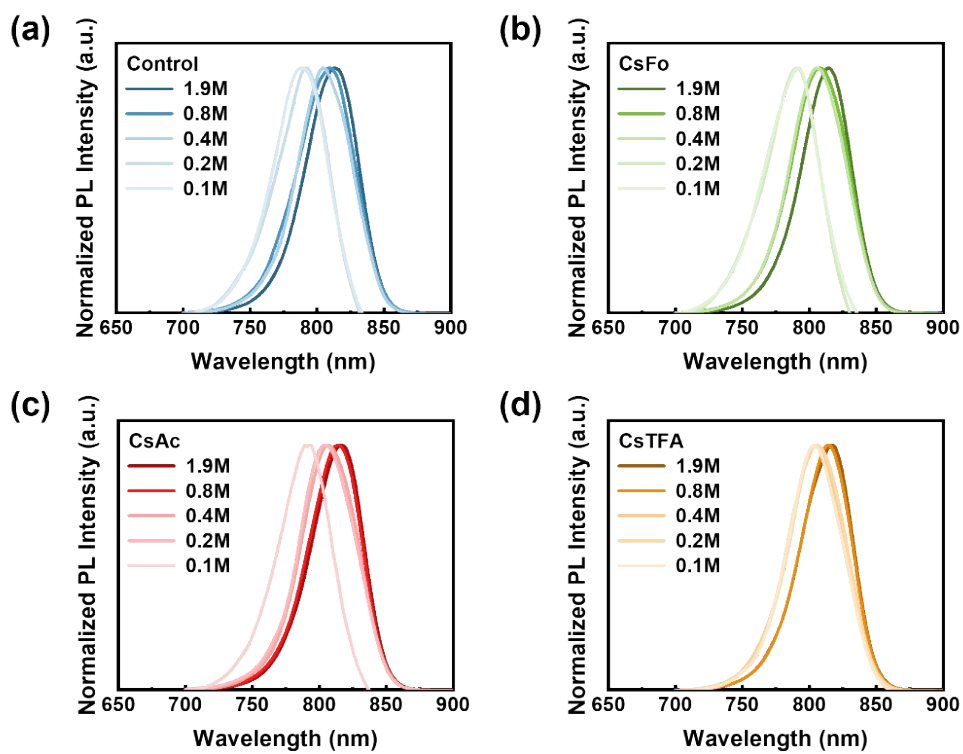

**Fig. S9** Normalized PL spectra with varying the thickness of the perovskite films deposited on the control- and CsX-treated  $\text{SnO}_2$ .

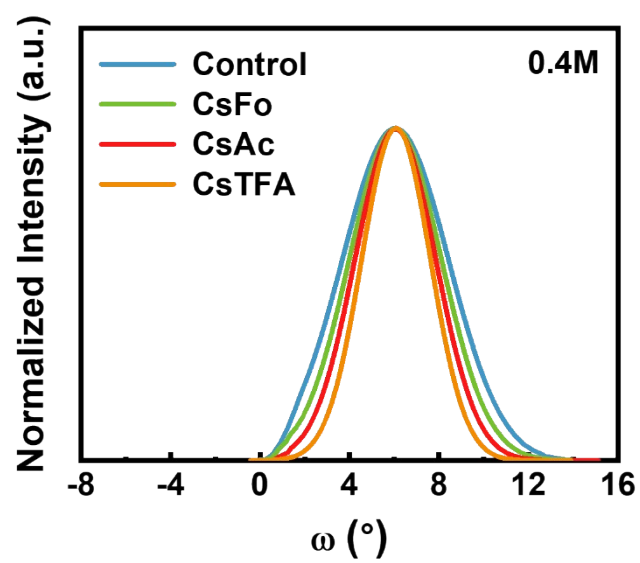

**Fig. S10** XRD rocking curves of the perovskite films (with a concentration of 0.4M) deposited on the control- and CsX-treated SnO<sub>2</sub>.

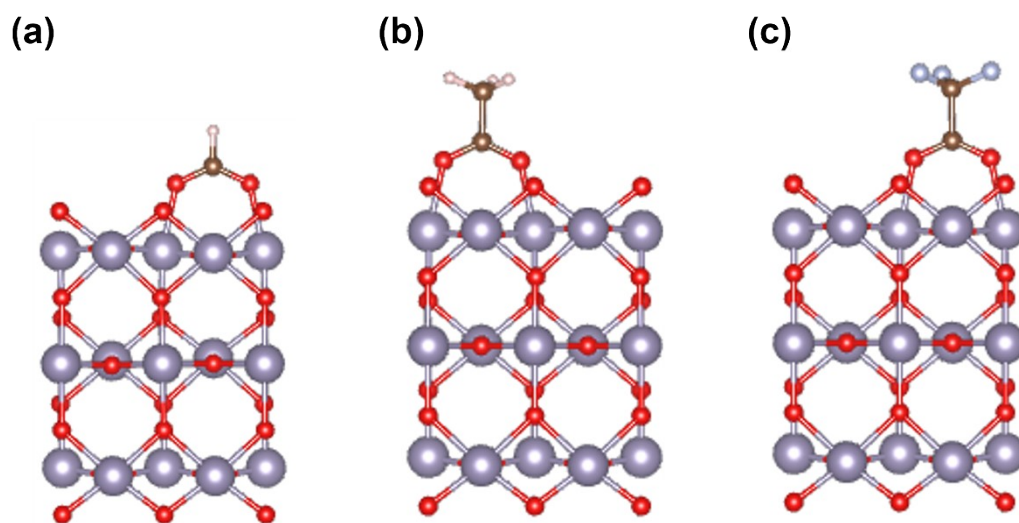

**Fig. S11** Side view along [010] of (a)  $\text{HCO}_2$ , (b)  $\text{CH}_3\text{CO}_2$ , and (c)  $\text{CF}_3\text{CO}_2$  molecules adsorbed on (111)  $\text{SnO}_2$  slab. Atomic color scheme: Sn (gray), O (red), H (pink), C (brown), F (blue).



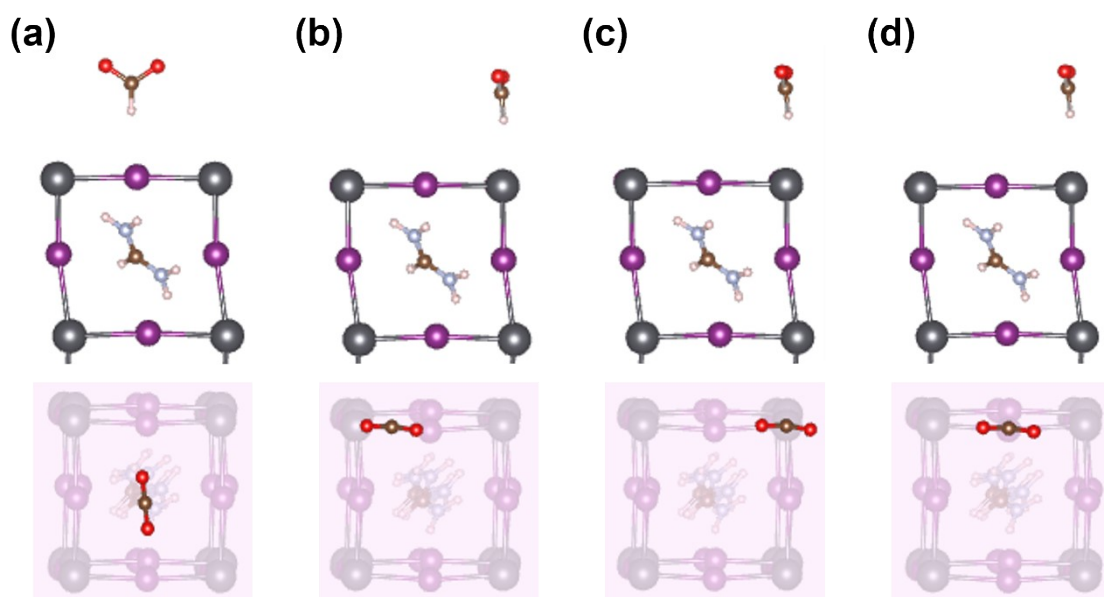

**Fig. S12** Optimized structures of  $\text{CO}_2\text{H}$  molecules adsorbed on (a) I top, (b) Pb top, (c) hollow, and (d) Pb-I bridge sites of  $\text{PbI}_2$ -terminated  $\text{FAPbI}_3$  perovskite.

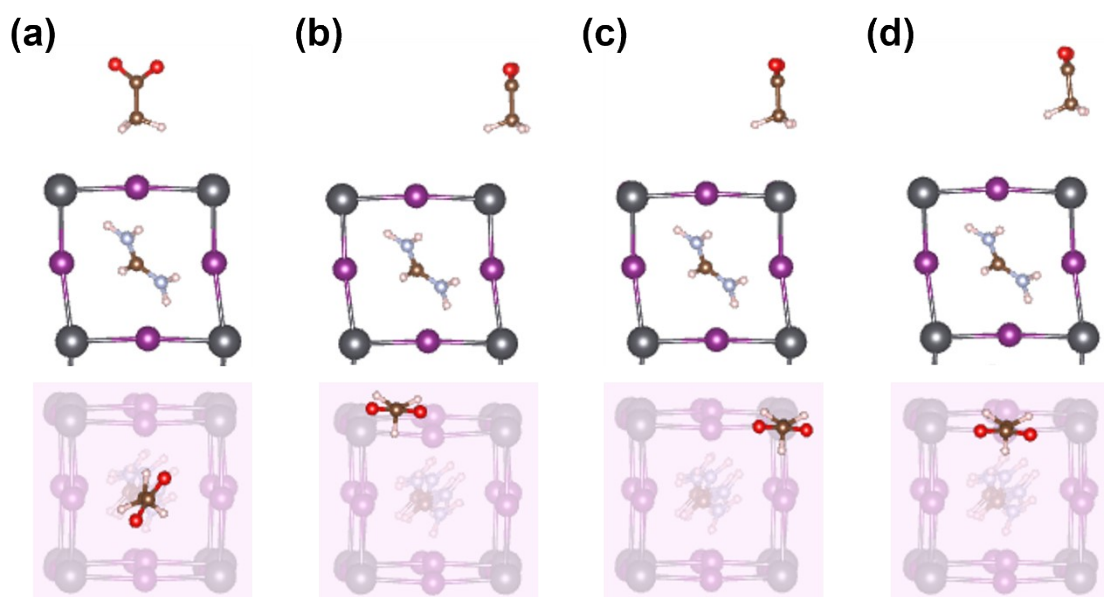

**Fig. S13** Optimized structures of  $\text{CO}_2\text{CH}_3$  molecules adsorbed on (a) I top, (b) Pb top, (c) hollow, and (d) Pb-I bridge sites of  $\text{PbI}_2$ -terminated  $\text{FAPbI}_3$  perovskite.

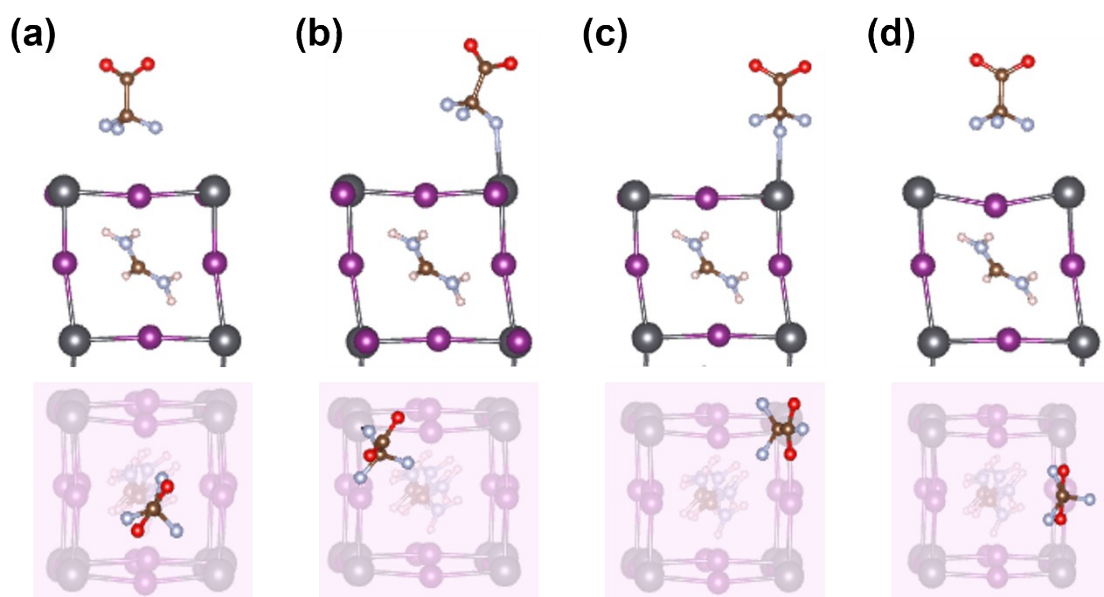

**Fig. S14** Optimized structures of  $\text{CO}_2\text{CF}_3$  molecules adsorbed on (a) I top, (b) Pb top, (c) hollow, and (d) Pb-I bridge sites of  $\text{PbI}_2$ -terminated  $\text{FAPbI}_3$  perovskite.

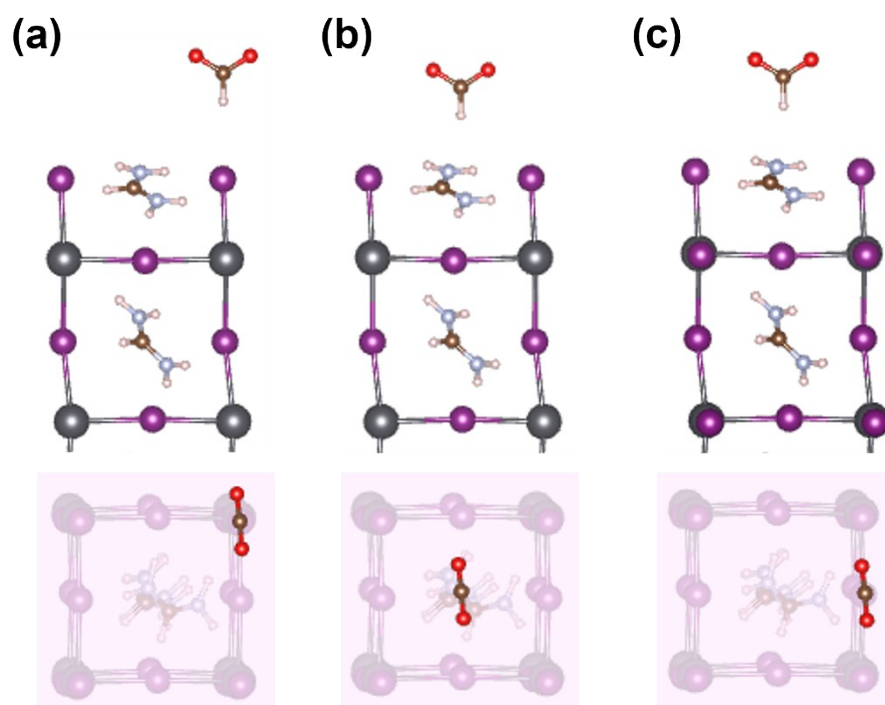

**Fig. S15** Optimized structures of  $\text{CO}_2\text{H}$  molecules adsorbed on (a) I top, (b) hollow, and (c) I-I bridge sites of FAI-terminated  $\text{FAPbI}_3$  perovskite.

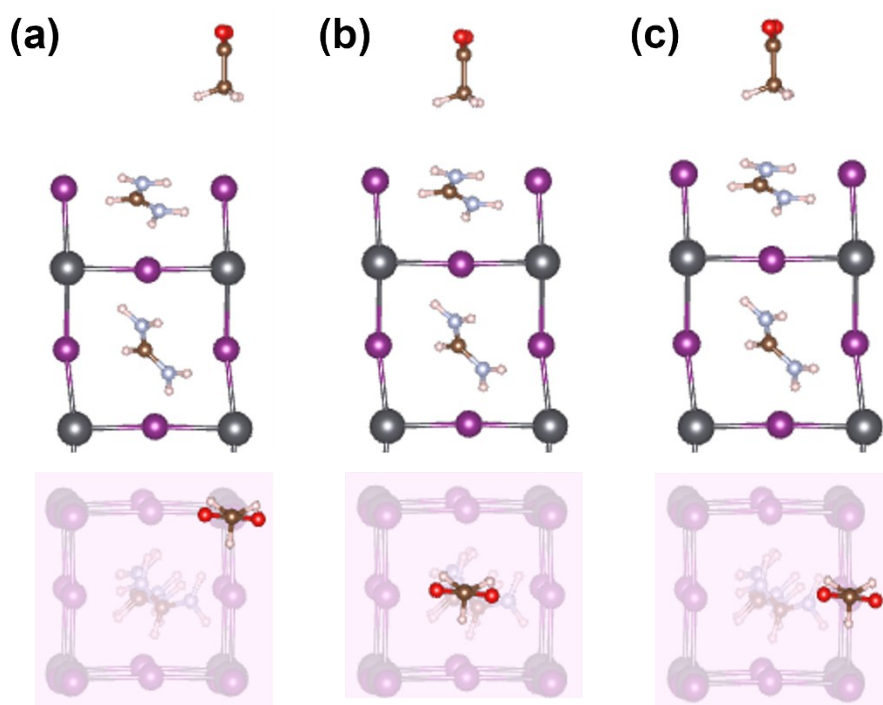

**Fig. S16** Optimized structures of  $\text{CO}_2\text{CH}_3$  molecules adsorbed on (a) I top, (b) hollow, and (c) I-I bridge sites of FAI-terminated  $\text{FAPbI}_3$  perovskite.

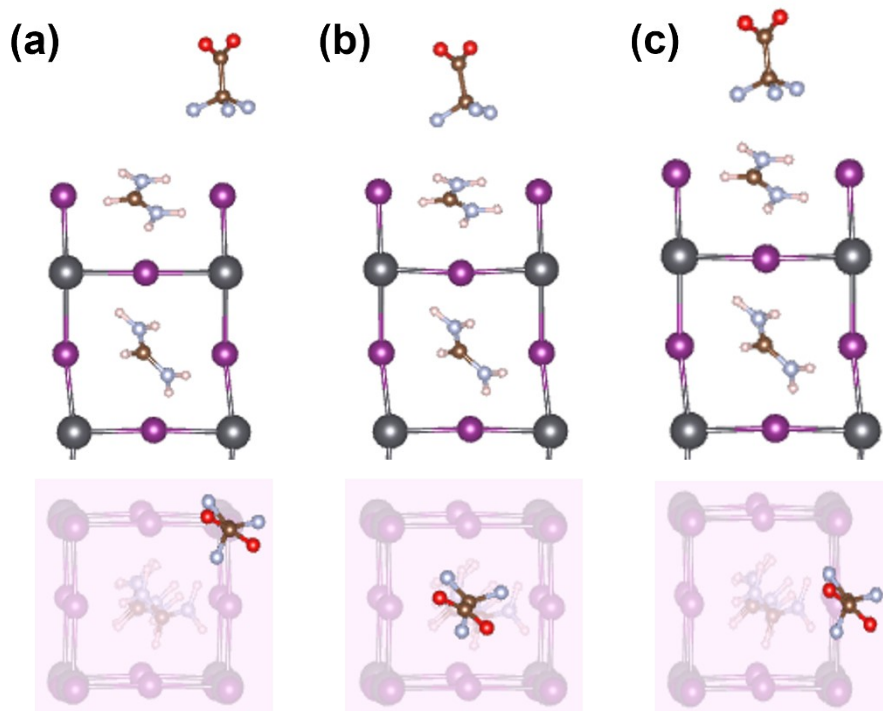

**Fig. S17** Optimized structures of  $\text{CO}_2\text{CF}_3$  molecules adsorbed on (a) I top, (b) hollow, and (c) I-I bridge sites of FAI-terminated  $\text{FAPbI}_3$  perovskite.

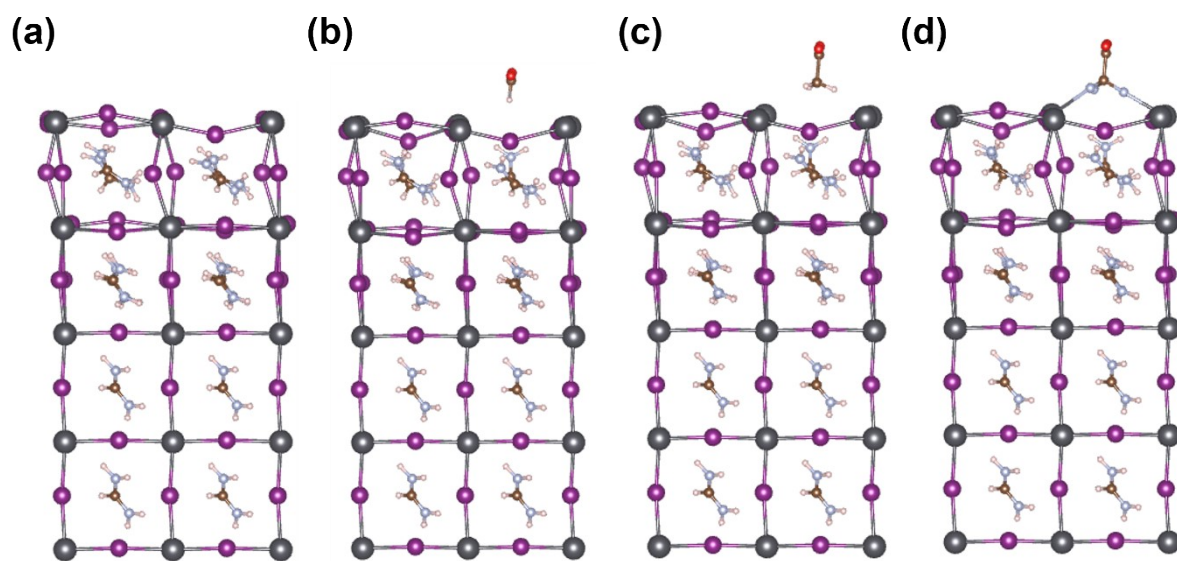

**Fig. S18** Side views along [100] of (a)  $\text{PbI}_2$ -terminated (001)  $\text{FAPbI}_3$  slab with iodine vacancy ( $V_i$ ) surface defect and its interface with (b)  $\text{HCO}_2$ , (c)  $\text{CH}_3\text{CO}_2$ , and (d)  $\text{CF}_3\text{CO}_2$  molecules. Atomic color scheme: Pb (gray), I (violet), N (blue), O (red), H (pink), C (brown), and F (blue).

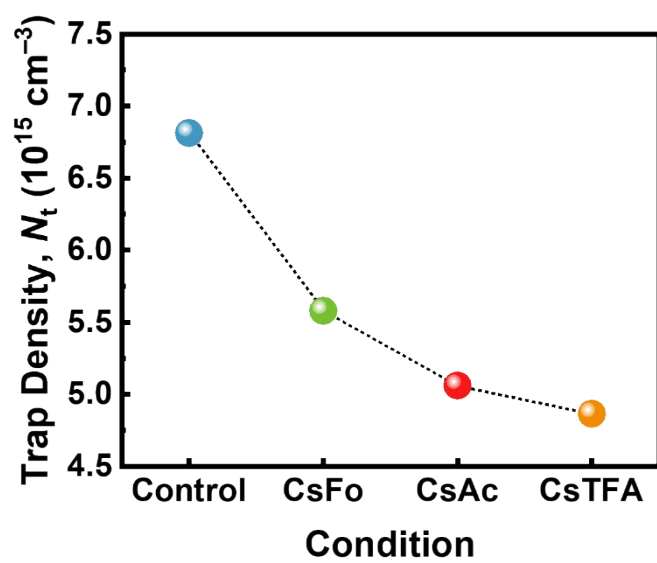

**Fig. S19** Trap densities obtained from SCLC measurements of the perovskite films deposited on the control- and CsX-treated  $\text{SnO}_2$ .



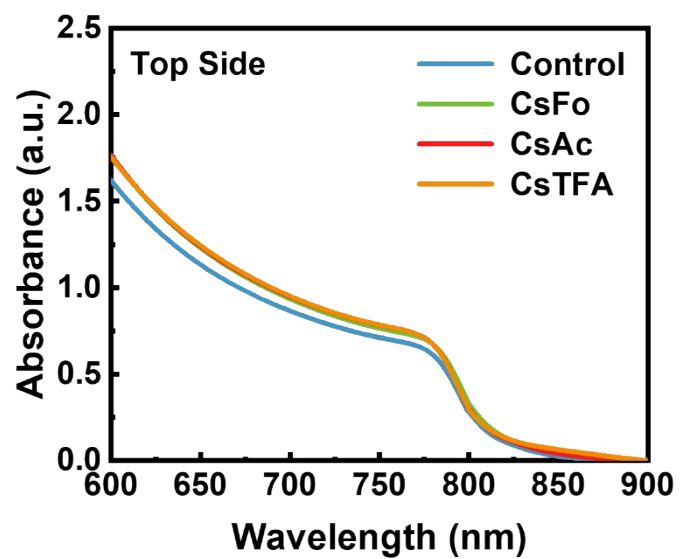

**Fig. S20** Absorption spectra of the perovskite films deposited on the control- and CsX-treated SnO<sub>2</sub>.

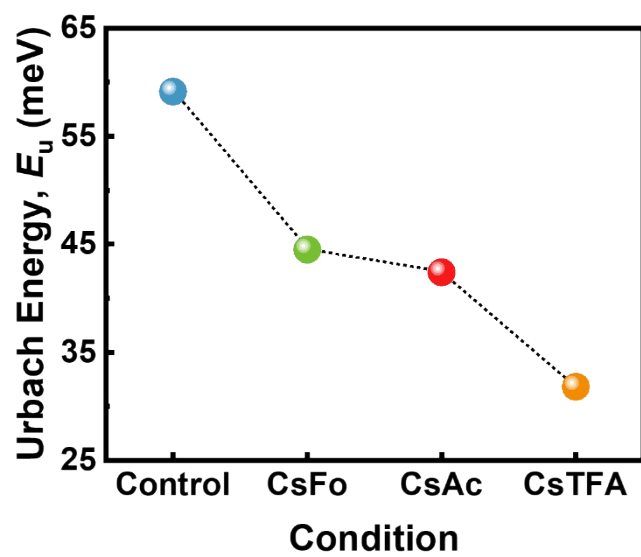

**Fig. S21** Urbach energy ( $E_u$ ) of the perovskite films deposited on the control- and CsX-treated  $\text{SnO}_2$ .

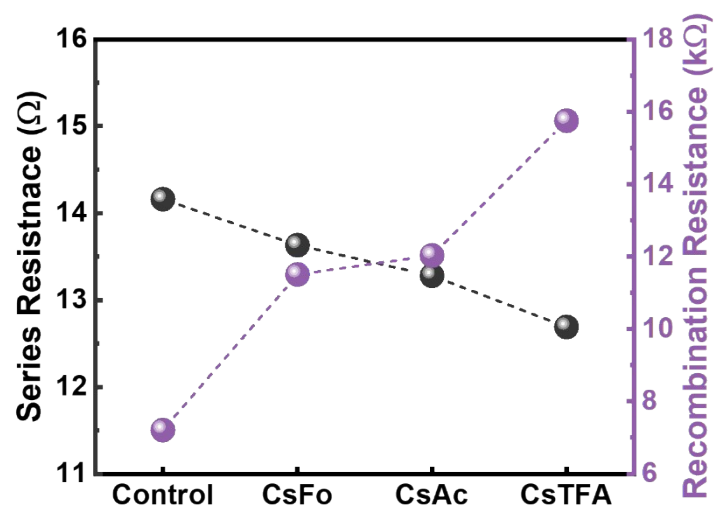

**Fig. S22** Series resistance ( $R_s$ ) and recombination resistance ( $R_{rec}$ ) values obtained from EIS measurements of the devices using control- and CsX-treated  $\text{SnO}_2$ .

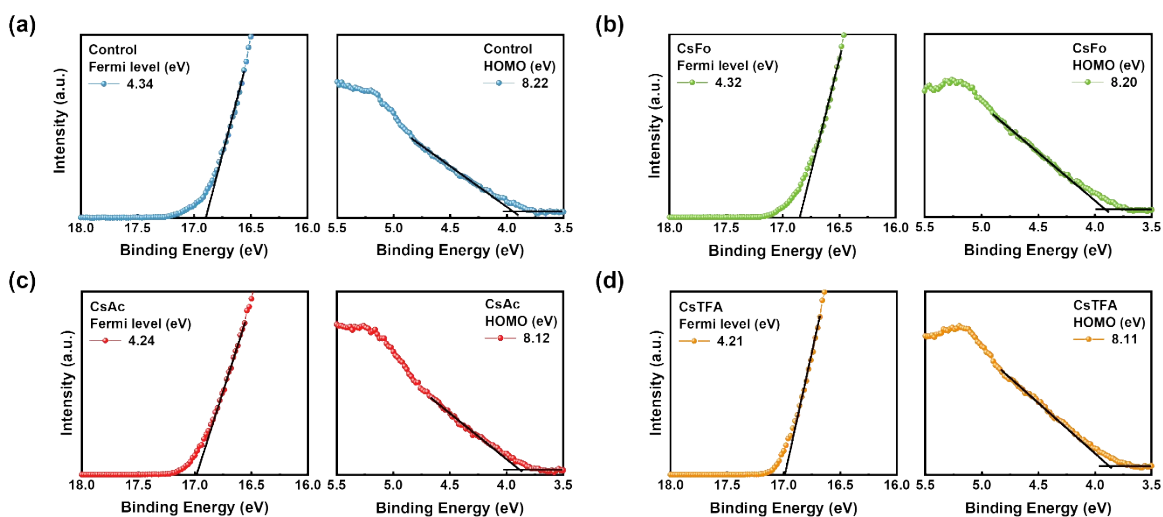

**Fig. S23** UPS spectra of the (a) control-SnO<sub>2</sub>, (b) CsFo-treated SnO<sub>2</sub>, (c) CsAc-treated SnO<sub>2</sub>, and (d) CsTFA-treated SnO<sub>2</sub>; (left) secondary edge region and (right) valence band edge plotted relative to a gold reference.

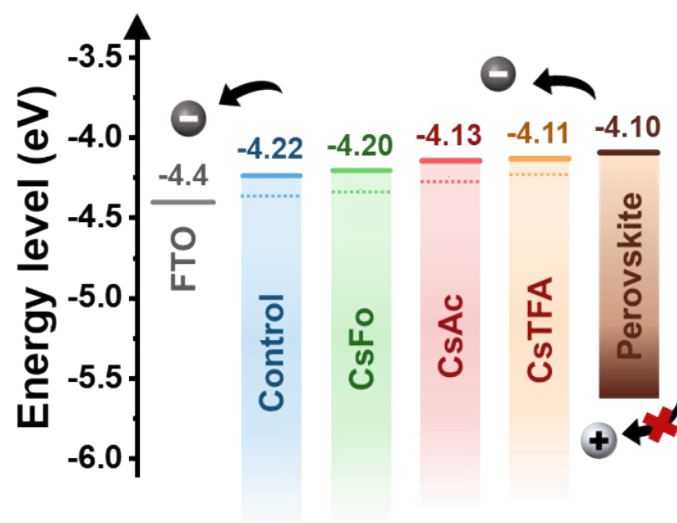

**Fig. S24** Schematic diagram of the energy level alignment of the control- and CsX-treated SnO<sub>2</sub>.

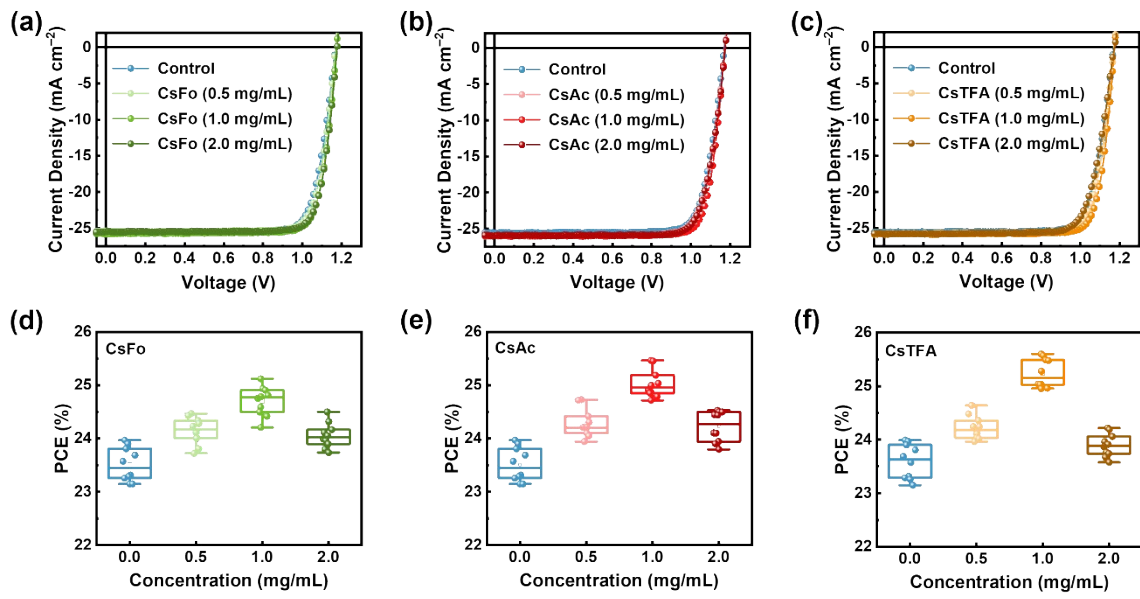

**Fig. S25**  $J-V$  curves and statistic distribution of PCE of the PSCs with varying concentration of CsX, (a, d) CsFo, (b, e) CsAc, and (c, f) CsTFA.

• Test result  
 • 253904 : Area 0.0803 cm<sup>2</sup>

| Test result | V <sub>oc</sub> (V) | I <sub>sc</sub> (mA) | J <sub>sc</sub> (mA/cm <sup>2</sup> ) | F.F.(%) | I <sub>max</sub> (mA) | V <sub>max</sub> (V) | P <sub>max</sub> (mW) | Eff.(%) |
|-------------|---------------------|----------------------|---------------------------------------|---------|-----------------------|----------------------|-----------------------|---------|
| Test result | 1.1726              | 2.107                | 26.2398                               | 82.52   | 2.0236                | 1.0076               | 2.0391                | 25.3904 |

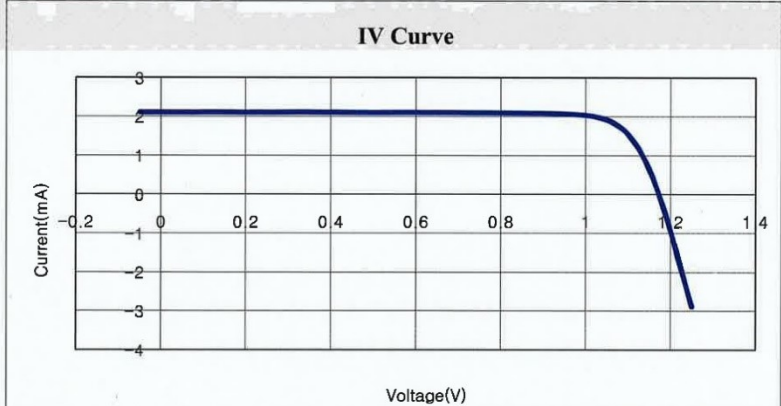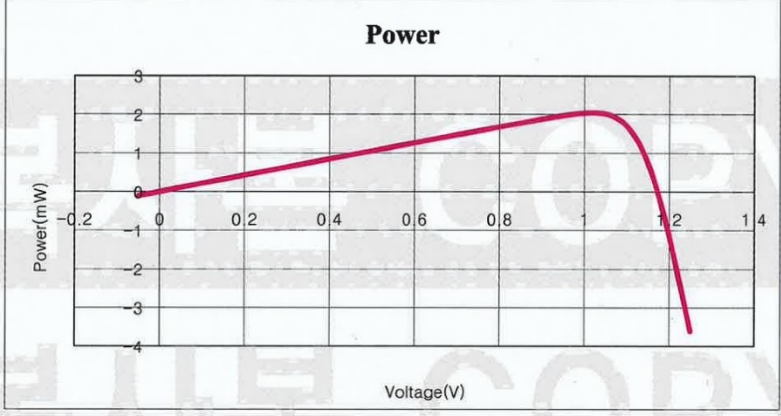

**Fig. 26** Certificated PV performance for the photovoltaic with 0.0803 cm<sup>2</sup> active area from an accredited photovoltaic certification laboratory (Daegu Techpark, Republic of Korea). The certificated efficiency is 25.39%.

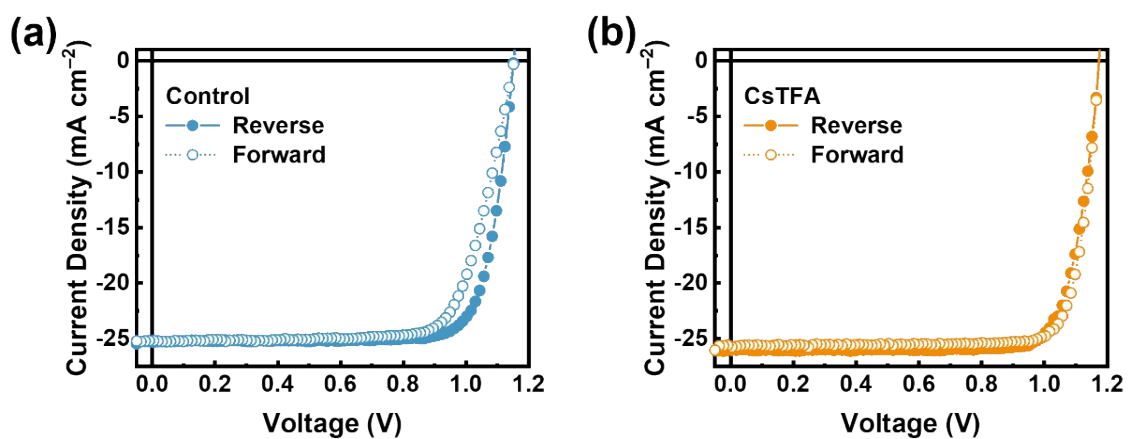

**Fig. S27**  $J-V$  curves of the PSCs using the (a) control- and (b) CsTFA-treated  $\text{SnO}_2$  under both reverse and forward scanning directions.



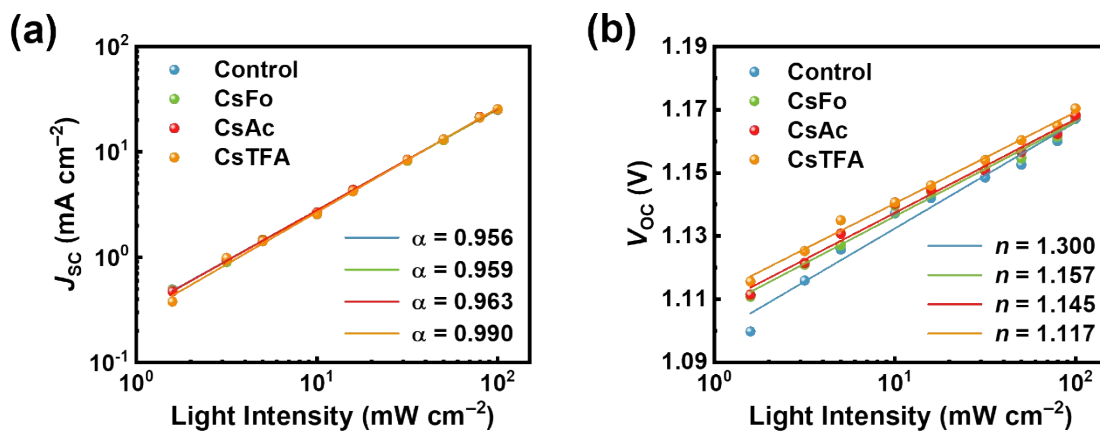

**Fig. S28** The measured (a)  $J_{sc}$  and (b)  $V_{oc}$  with varying light intensity of the PSCs using the control- and CsX-treated  $\text{SnO}_2$ .

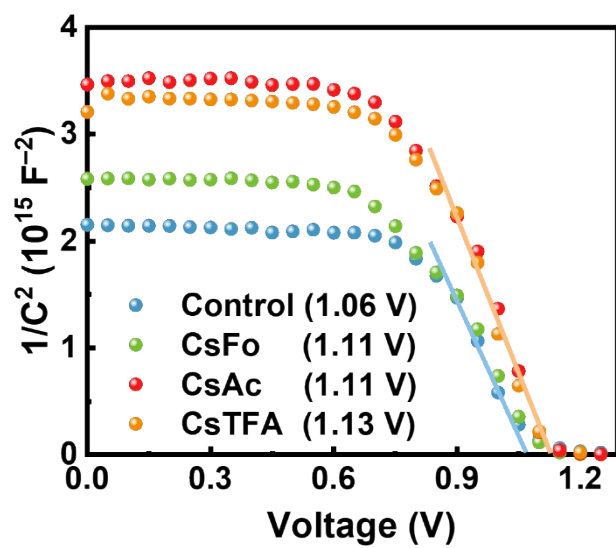

**Figure S29** Mott-Schottky curves of the PSCs using the control- and CsX-treated SnO<sub>2</sub>.

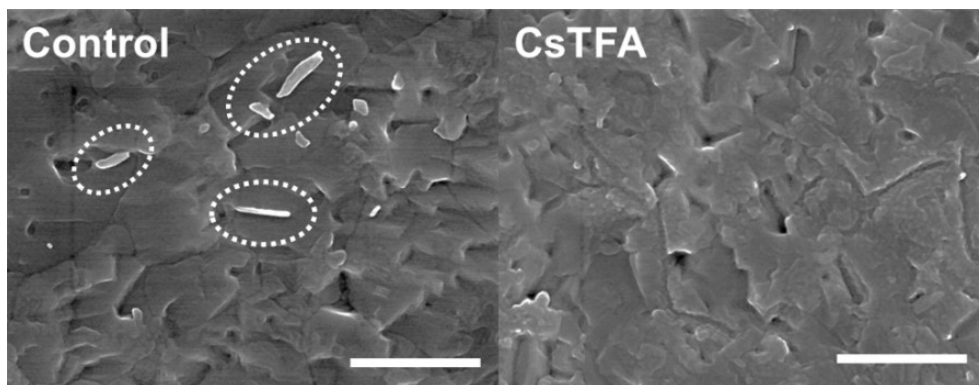

**Fig. S30** SEM images of the perovskite films that were peeled off from the control- and CsTFA-treated SnO<sub>2</sub>. (The scale bar is 1  $\mu$ m).

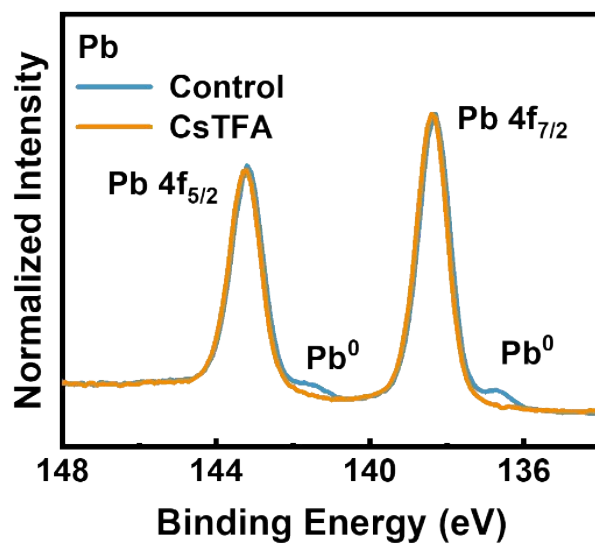

**Fig. S31** XPS spectra corresponding to the Pb 4f peak of the perovskite films that were peeled off from the control- and CsTFA-treated SnO<sub>2</sub> after being subjected to 24 hours of light illumination.

**Table S1.** Summarized molecular adsorption energies of HCO<sub>2</sub>, CH<sub>3</sub>CO<sub>2</sub>, and CF<sub>3</sub>CO<sub>2</sub> molecules on I top, Pb top, hollow, Pb-I bridge sites of PbI<sub>2</sub>-terminated FAPbI<sub>3</sub> perovskite.

| <b>Adsorption sites</b>  | <b>Adsorption Energy (eV)</b> |                         |               |                    |
|--------------------------|-------------------------------|-------------------------|---------------|--------------------|
|                          | <b>I<sub>top</sub></b>        | <b>Pb<sub>top</sub></b> | <b>Hollow</b> | <b>Pb-I bridge</b> |
| CsFo@FAPbI <sub>3</sub>  | -0.16                         | -0.14                   | -0.17         | -0.20              |
| CsAc@FAPbI <sub>3</sub>  | -0.16                         | -0.20                   | -0.19         | -0.26              |
| CsTFA@FAPbI <sub>3</sub> | -0.42                         | -0.42                   | -0.47         | -0.44              |

**Table S2.** Summarized molecular adsorption energies of HCO<sub>2</sub>, CH<sub>3</sub>CO<sub>2</sub>, and CF<sub>3</sub>CO<sub>2</sub> molecules on I top, hollow, I-I bridge sites of FAI-terminated FAPbI<sub>3</sub> perovskite.

| <b>Adsorption sites</b>  | <b>Adsorption Energy (eV)</b> |               |                   |
|--------------------------|-------------------------------|---------------|-------------------|
|                          | <b>I<sub>top</sub></b>        | <b>Hollow</b> | <b>I-I bridge</b> |
| CsFo@FAPbI <sub>3</sub>  | -0.16                         | -0.17         | -0.17             |
| CsAc@FAPbI <sub>3</sub>  | -0.12                         | -0.14         | -0.16             |
| CsTFA@FAPbI <sub>3</sub> | -0.42                         | -0.46         | -0.49             |

**Table S3.** Summarized biexponential fitting parameters for time-resolved PL lifetimes of the perovskite films deposited on the control- and CsX-treated SnO<sub>2</sub>.

| <b>ETL</b> | <b><math>\tau_1</math> (ns)</b> | <b><math>f_1</math> (%)</b> | <b><math>\tau_2</math> (ns)</b> | <b><math>f_2</math> (%)</b> | <b><math>\tau_{\text{avg}}</math> (ns)</b> | <b><math>\chi^2</math></b> |
|------------|---------------------------------|-----------------------------|---------------------------------|-----------------------------|--------------------------------------------|----------------------------|
| Control    | 435.34                          | 40.11                       | 121.61                          | 59.89                       | 247.45                                     | 1.07                       |
| CsFo       | 364.40                          | 36.17                       | 97.03                           | 63.83                       | 193.73                                     | 1.13                       |
| CsAc       | 329.63                          | 27.62                       | 85.89                           | 72.38                       | 153.21                                     | 1.00                       |
| CsTFA      | 251.85                          | 24.50                       | 67.27                           | 75.50                       | 108.71                                     | 0.98                       |

**Table S4.** Detailed  $J$ - $V$  parameters of the optimized PSCs using the control- and CsX-treated SnO<sub>2</sub> ETLs under reverse voltage scan.

| <b>Condition</b> | <b><math>V_{oc}</math><br/>(V)</b> | <b><math>J_{sc}</math><br/>(mA cm<sup>-2</sup>)</b> | <b>FF<br/>(%)</b>      | <b>Integrated <math>J_{sc}</math><br/>(mA cm<sup>-2</sup>)</b> | <b>PCE<br/>(%)</b>    |
|------------------|------------------------------------|-----------------------------------------------------|------------------------|----------------------------------------------------------------|-----------------------|
| Control          | 1.171<br>(1.168±0.002)             | 25.78<br>(25.26±0.10)                               | 78.71<br>(74.63 ±1.95) | 25.30                                                          | 23.77<br>(23.51±0.30) |
| CsFo             | 1.173<br>(1.171±0.002)             | 25.89<br>(25.31±0.05)                               | 82.72<br>(80.99±0.55)  | 25.37                                                          | 25.13<br>(24.70±0.26) |
| CsAc             | 1.174<br>(1.173±0.006)             | 25.98<br>(25.59±0.11)                               | 83.48<br>(81.06±0.59)  | 25.78                                                          | 25.46<br>(25.03±0.25) |
| CsTFA            | 1.175<br>(1.174±0.006)             | 26.00<br>(25.76±0.16)                               | 83.81<br>(82.18±0.43)  | 25.98                                                          | 25.60<br>(25.24±0.25) |



**Table S5.** Detailed  $J$ - $V$  parameters of the optimized PSCs using the control- and CsTFA-treated SnO<sub>2</sub> ETLs under both reverse and forward voltage scans.

| <b>Condition</b>         | <b>Scan direction</b> | <b><math>V_{oc}</math><br/>(V)</b> | <b><math>J_{sc}</math><br/>(mA cm<sup>-2</sup>)</b> | <b>FF<br/>(%)</b> | <b>PCE<br/>(%)</b> | <b>HI</b> |
|--------------------------|-----------------------|------------------------------------|-----------------------------------------------------|-------------------|--------------------|-----------|
| Control-SnO <sub>2</sub> | Reverse               | 1.152                              | 25.294                                              | 0.797             | 23.224             | 0.067     |
|                          | Forward               | 1.153                              | 25.186                                              | 0.746             | 21.663             |           |
| CsTFA-SnO <sub>2</sub>   | Reverse               | 1.173                              | 26.003                                              | 0.832             | 25.377             | 0.015     |
|                          | Forward               | 1.174                              | 25.857                                              | 0.823             | 24.983             |           |

## Supplementary References

1. G. Kresse, J. Furthmüller. *Comput. Mater. Sci.*, 1996, **6**, 15–50.
2. J. P. Perdew, K. Burke, M. Ernzerhof. *Physical Review Letters*, 1996, **77**, 3865–3868.
3. S. Grimme, J. Antony, S. Ehrlich, H. Krieg. *The Journal of Chemical Physics*, 2010, **132**, 154104.
4. M. T. Weller, O. J. Weber, J. M. Frost, A. Walsh. *J. Phys. Chem. Lett.*, 2015, **6**, 3209–3212.
5. C. Zhu, X. Niu, Y. Fu, N. Li, C. Hu, Y. Chen, X. He, G. Na, P. Liu, H. Zai, Y. Ge, Y. Lu, X. Ke, Y. Bai, S. Yang, P. Chen, Y. Li, M. Sui, L. Zhang, H. Zhou, Q. Chen, *Nat. Commun.* 2019, **10**, 815.
6. L. Guo, G. Tang, J. Hong, *Chinese Phys. Lett.* 2019, **36**, 056201.
